# Supplementary material for: Surface modified novel magnetically tuned halloysite functionalized sulfonic acid: synthesis, characterization and catalytic activity
Source: Royal Society of Chemistry journal article supplement (doi:10.1039/d1cy00285f), 2021-01-01
Supplement: d1cy00285f1.pdf [file d1cy00285f1.pdf]

## Supplementary information

### Surface modified novel magnetically tuned halloysite functionalized sulfonic acid: Synthesis, characterization and catalytic activity

Pawan Kumar<sup>a</sup>, Princy Gupta<sup>a\*</sup> and Chandan Sharma<sup>b</sup>

<sup>a</sup>Department of Chemistry and Chemical Sciences, Central University of Jammu, Rahya-Suchani (Bagla), District-Samba, Jammu-181143, J&K, India

<sup>b</sup>Department of Chemistry, University of Jammu, Jammu, 180 006, India

\*Corresponding author: e-mail address: [princy.che@cuammu.ac.in](mailto:princy.che@cuammu.ac.in),  
[guptaprinicy2007@gmail.com](mailto:guptaprinicy2007@gmail.com)

| Contents                                                                                                                                                                      | Page |
|-------------------------------------------------------------------------------------------------------------------------------------------------------------------------------|------|
| <sup>1</sup> H and <sup>13</sup> C data of some representative compounds.                                                                                                     | S1   |
| STEM Elemental Mapping of M-Fe <sub>3</sub> O <sub>4</sub> @HAL-SO <sub>3</sub> H                                                                                             | S3   |
| <sup>1</sup> H NMR spectra of <i>N,N'</i> -(4-Chlorophenylmethylene)dibenzamide (table 2, entry 1d).                                                                          | S4   |
| <sup>1</sup> H NMR spectra of <i>N,N'</i> -(4-Fluorophenylmethylene)dibenzamide (table 2, entry 1f).                                                                          | S5   |
| <sup>1</sup> H NMR and <sup>13</sup> C spectra of <i>N,N'</i> -(2-Nitrophenylmethylene)dibenzamide (table 2, entry 1g).                                                       | S6   |
| <sup>1</sup> H NMR and <sup>13</sup> C spectra of <i>N,N'</i> -(3-Nitrophenylmethylene)dibenzamide (table 2, entry 1h).                                                       | S7   |
| <sup>1</sup> H NMR and <sup>13</sup> C spectra of <i>N,N'</i> -(4-Nitrophenylmethylene)dibenzamide (table 2, entry 1i).                                                       | S8   |
| <sup>1</sup> H NMR and <sup>13</sup> C spectra of 2-Amino-7,7-dimethyl-4-(4-Methylphenyl)-5-oxo-5,6,7,8-tetrahydro-4 <i>H</i> -chromene-3-carbonitrile (table 5, entry 2b).   | S9   |
| <sup>1</sup> H NMR and <sup>13</sup> C spectra of 2-Amino-7,7-dimethyl-4-(4-Methoxy-phenyl)-5-oxo-5,6,7,8-tetrahydro-4 <i>H</i> -chromene-3-carbonitrile (table 5, entry 2c). | S10  |
| <sup>1</sup> H NMR and <sup>13</sup> C spectra of 2-Amino-7,7-dimethyl-4-(4-Fluorophenyl)-5-oxo-5,6,7,8-tetrahydro-4 <i>H</i> -chromene-3-carbonitrile (table 5, entry 2h).   | S11  |
| <sup>1</sup> H NMR and <sup>13</sup> C spectra of 2-Amino-7,7-dimethyl-4-(2-Nitrophenyl)-5-oxo-5,6,7,8-tetrahydro-4 <i>H</i> -chromene-3-carbonitrile (table 5, entry 2i).    | S12  |
| <sup>1</sup> H NMR and <sup>13</sup> C spectra of 2-Amino-7,7-dimethyl-4-(4-Furan)-5-oxo-5,6,7,8-tetrahydro-4 <i>H</i> -chromene-3-carbonitrile (table 5, entry 2l).          | S13  |

## <sup>1</sup>H and <sup>13</sup>C data of some representative compounds

***N,N'*-(4-Chlorophenylmethylene)dibenzamide (Figure S2, table 2, entry 1d):** White solid, <sup>1</sup>H NMR (400 MHz, DMSO) δ 9.10 (d, *J* = 7.6 Hz, 2H, NH, exchangeable with D<sub>2</sub>O), 7.92 (d, *J* = 7.4 Hz, 4H, aromatic H), 7.57 (t, *J* = 7.3 Hz, 2H, aromatic H), 7.48 (dd, *J* = 18.4, 8.1 Hz, 8H, aromatic H), 6.99 (t, *J* = 7.4 Hz, 1H, CH).

***N,N'*-(4-Fluorophenylmethylene)dibenzamide (Figure S3, table 2, entry 1f):** White solid, <sup>1</sup>H NMR (600 MHz, ) δ 9.00 (d, *J* = 7.6 Hz, 2H, exchangeable with D<sub>2</sub>O), 7.89 – 7.86 (m, 4H, aromatic H), 7.54 – 7.51 (m, 2H, aromatic H), 7.48 – 7.43 (m, 6H, aromatic H), 7.20 – 7.15 (m, 2H, aromatic H), 6.97 (t, *J* = 7.6 Hz, 1H, CH).

***N,N'*-(2-Nitrophenylmethylene)dibenzamide (Figure S4, S5, table 2, entry 1g):** White solid, <sup>1</sup>H NMR (400 MHz, DMSO) δ 9.21 (d, *J* = 6.9 Hz, 2H, NH, exchangeable with D<sub>2</sub>O), 8.00 (d, *J* = 7.9 Hz, 1H, aromatic H), 7.91 (d, *J* = 7.4 Hz, 4H, aromatic H), 7.84 – 7.73 (m, 2H, aromatic H), 7.62 (t, *J* = 7.1 Hz, 1H, aromatic H), 7.56 (t, *J* = 7.3 Hz, 2H, aromatic H), 7.48 (t, *J* = 7.5 Hz, 4H, aromatic H), 7.41 (t, *J* = 6.9 Hz, 1H, CH). <sup>13</sup>C NMR (101 MHz, DMSO) δ 166.46, 148.98, 134.23, 134.03, 132.09, 129.72, 129.29, 128.69, 128.17, 124.89, 56.56.

***N,N'*-(3-Nitrophenylmethylene)dibenzamide (Figure S6, S7, table 2, entry 1h):** White solid, <sup>1</sup>H NMR (400 MHz, DMSO) δ 9.27 (d, *J* = 7.3 Hz, 2H, NH, exchangeable with D<sub>2</sub>O), 8.34 (s, 1H, aromatic H), 8.22 (d, *J* = 8.1 Hz, 1H, aromatic H), 7.94 (t, *J* = 7.5 Hz, 5H, aromatic H), 7.71 (t, *J* = 7.9 Hz, 1H, aromatic H), 7.58 (t, *J* = 7.3 Hz, 2H, aromatic H), 7.50 (t, *J* = 7.5 Hz, 4H, aromatic H), 7.08 (t, *J* = 7.2 Hz, 1H, CH). <sup>13</sup>C NMR (101 MHz, DMSO) δ 166.39, 148.27, 134.27, 134.01, 132.24, 130.47, 128.83, 128.10, 123.28, 121.89, 59.08.

***N,N'*-(4-Nitrophenylmethylene)dibenzamide (Figure S8, S9, table 2, entry 1i):** White solid, <sup>1</sup>H NMR (400 MHz, DMSO) δ 9.26 (d, *J* = 7.4 Hz, 2H, NH, exchangeable with D<sub>2</sub>O), 8.30 – 8.24 (m, 2H, aromatic H), 7.93 (t, *J* = 8.9 Hz, 4H, aromatic H), 7.75 (d, *J* = 8.7 Hz, 2H, aromatic H), 7.58 (t, *J* = 7.3 Hz, 2H, aromatic H), 7.50 (t, *J* = 7.5 Hz, 4H, aromatic H), 7.08 (t, *J* = 7.2 Hz, 1H, CH). <sup>13</sup>C NMR (101 MHz, DMSO) δ 166.37, 148.03, 133.97, 132.25, 131.86, 128.82, 128.53, 128.09, 124.01, 59.01.

***2-Amino-7,7-dimethyl-4-(4-Methylphenyl)-5-oxo-5,6,7,8-tetrahydro-4H-chromene-3-carbonitrile (Figure S10, S11, table 5, entry 2b):*** White solid <sup>1</sup>H NMR (400 MHz, DMSO) δ 7.29 (t, *J* = 7.5 Hz, 2H, aromatic H), 7.14 (d, *J* = 7.3 Hz, 2H, aromatic H), 7.03 (s, 2H, NH<sub>2</sub>), 4.17 (s, 1H, CH), 2.58 – 2.44 (m, 5H, CH<sub>2</sub>, CH<sub>3</sub>), 2.26 (d, *J* = 16.1 Hz, 1H, CH<sub>2</sub>), 2.10 (d, *J* = 16.1 Hz, 1H, CH<sub>2</sub>), 1.04 (s, 3H, CH<sub>3</sub>), 0.96 (s, 3H, CH<sub>3</sub>). <sup>13</sup>C NMR (101 MHz, DMSO) δ 196.17, 162.99, 158.94, 145.22, 128.81, 127.61, 127.05, 120.22, 113.17, 58.72, 50.42, 36.02, 32.29, 28.86, 27.25.

***2-Amino-7,7-dimethyl-4-(4-Methoxy-phenyl)-5-oxo-5,6,7,8-tetrahydro-4H-chromene-3-carbonitrile (Figure S12, S13, table 5, entry 2c):*** White solid <sup>1</sup>H NMR (400 MHz, DMSO) δ 7.05 (d, *J* = 8.6 Hz, 2H, aromatic H), 6.99 (s, 2H, NH<sub>2</sub>), 6.84 (d, *J* = 8.6 Hz, 2H, aromatic H), 4.12 (s, 1H, CH), 3.71 (s, 3H, OCH<sub>3</sub>), 2.51 (d, *J* = 1.5 Hz, 2H, CH<sub>2</sub>), 2.25 (d, *J* = 16.1 Hz, 1H, CH<sub>2</sub>), 2.12 – 2.05 (m, 1H, CH<sub>2</sub>), 1.01 (s, *J* = 17.8 Hz, 3H, CH<sub>3</sub>), 0.95 (s, 3H, CH<sub>3</sub>). <sup>13</sup>C NMR (101 MHz, DMSO) δ 196.17, 162.62, 158.86, 158.36, 137.32, 128.69, 120.31, 114.13, 113.43, 58.96, 55.45, 50.45, 35.20, 32.27, 28.89, 27.22.

***2-Amino-7,7-dimethyl-4-(4-Fluorophenyl)-5-oxo-5,6,7,8-tetrahydro-4H-chromene-3-carbonitrile (Figure S14, S15, table 5, entry 2h):*** White solid, <sup>1</sup>H NMR (400 MHz, DMSO) δ 7.18 (dd, *J* = 8.6, 5.6 Hz, 2H, aromatic H), 7.11 (t, *J* = 8.8 Hz, 2H, aromatic H), 7.04 (s, 2H, NH<sub>2</sub>), 4.20 (s, 1H, CH), 2.51 (s, 2H, CH<sub>2</sub>), 2.25 (d, *J* = 16.1 Hz, 1H, CH<sub>2</sub>), 2.11 (d, *J* = 16.1 Hz, 1H, CH<sub>2</sub>), 1.04 (s, 3H, CH<sub>3</sub>), 0.95 (s, 3H, CH<sub>3</sub>). <sup>13</sup>C NMR (101 MHz, DMSO) δ 196.19, 162.97, 162.56, 160.16, 159.78, 158.94, 141.42, 141.39, 129.55, 129.47, 120.11, 115.60, 115.39, 113.05, 58.54, 50.42, 35.37, 32.26, 28.79, 27.30.

**2-Amino-7,7-dimethyl-4-(2-Nitrophenyl)-5-oxo-5,6,7,8-tetrahydro-4H-chromene-3-carbonitrile** (Figure S16, S17, table 5, entry 2i): Yellow solid,  $^1\text{H}$  NMR (400 MHz, DMSO)  $\delta$  7.85 – 7.79 (m, 1H, aromatic H), 7.66 (t,  $J = 7.2$  Hz, 1H, aromatic H), 7.47 – 7.33 (m, 2H aromatic H), 7.22 (s, 2H,  $\text{NH}_2$ ), 4.94 (s, 1H, CH), 2.50 (dd,  $J = 8.7, 6.8$  Hz, 2H,  $\text{CH}_2$ ), 2.21 (d,  $J = 16.1$  Hz, 1H,  $\text{CH}_2$ ), 2.02 (d,  $J = 16.1$  Hz, 1H,  $\text{CH}_2$ ), 1.04 (s, 3H,  $\text{CH}_3$ ), 0.88 (s, 3H,  $\text{CH}_3$ ).  $^{13}\text{C}$  NMR (101 MHz, DMSO)  $\delta$  196.32, 163.20, 159.66, 149.43, 139.43, 133.85, 130.75, 128.34, 124.19, 119.56, 112.78, 56.75, 50.00, 32.32, 30.37, 28.76, 27.14.

**2-Amino-7,7-dimethyl-4-(4-Furan)-5-oxo-5,6,7,8-tetrahydro-4H-chromene-3-carbonitrile** (Figure S18, S19, table 5, entry 2l): Orange solid,  $^1\text{H}$  NMR (400 MHz, DMSO)  $\delta$  7.49 (d,  $J = 1.0$  Hz, 1H, aromatic H), 7.11 (s, 2H,  $\text{NH}_2$ ), 6.33 (dd,  $J = 3.0, 1.9$  Hz, 1H, aromatic H), 6.06 (d,  $J = 3.1$  Hz, 1H, aromatic), 4.33 (s, 1H, CH), 2.51 (s, 2H,  $\text{CH}_2$ ), 2.29 (d,  $J = 16.1$  Hz, 1H,  $\text{CH}_2$ ), 2.17 (d,  $J = 16.1$  Hz, 1H,  $\text{CH}_2$ ), 1.05 (s, 3H,  $\text{CH}_3$ ), 0.99 (s, 3H,  $\text{CH}_3$ ).  $^{13}\text{C}$  NMR (101 MHz, DMSO)  $\delta$  195.94, 163.76, 159.77, 156.18, 142.25, 120.06, 118.74, 110.93, 110.79, 105.54, 55.79, 50.34, 32.30, 29.43, 28.90, 27.01.

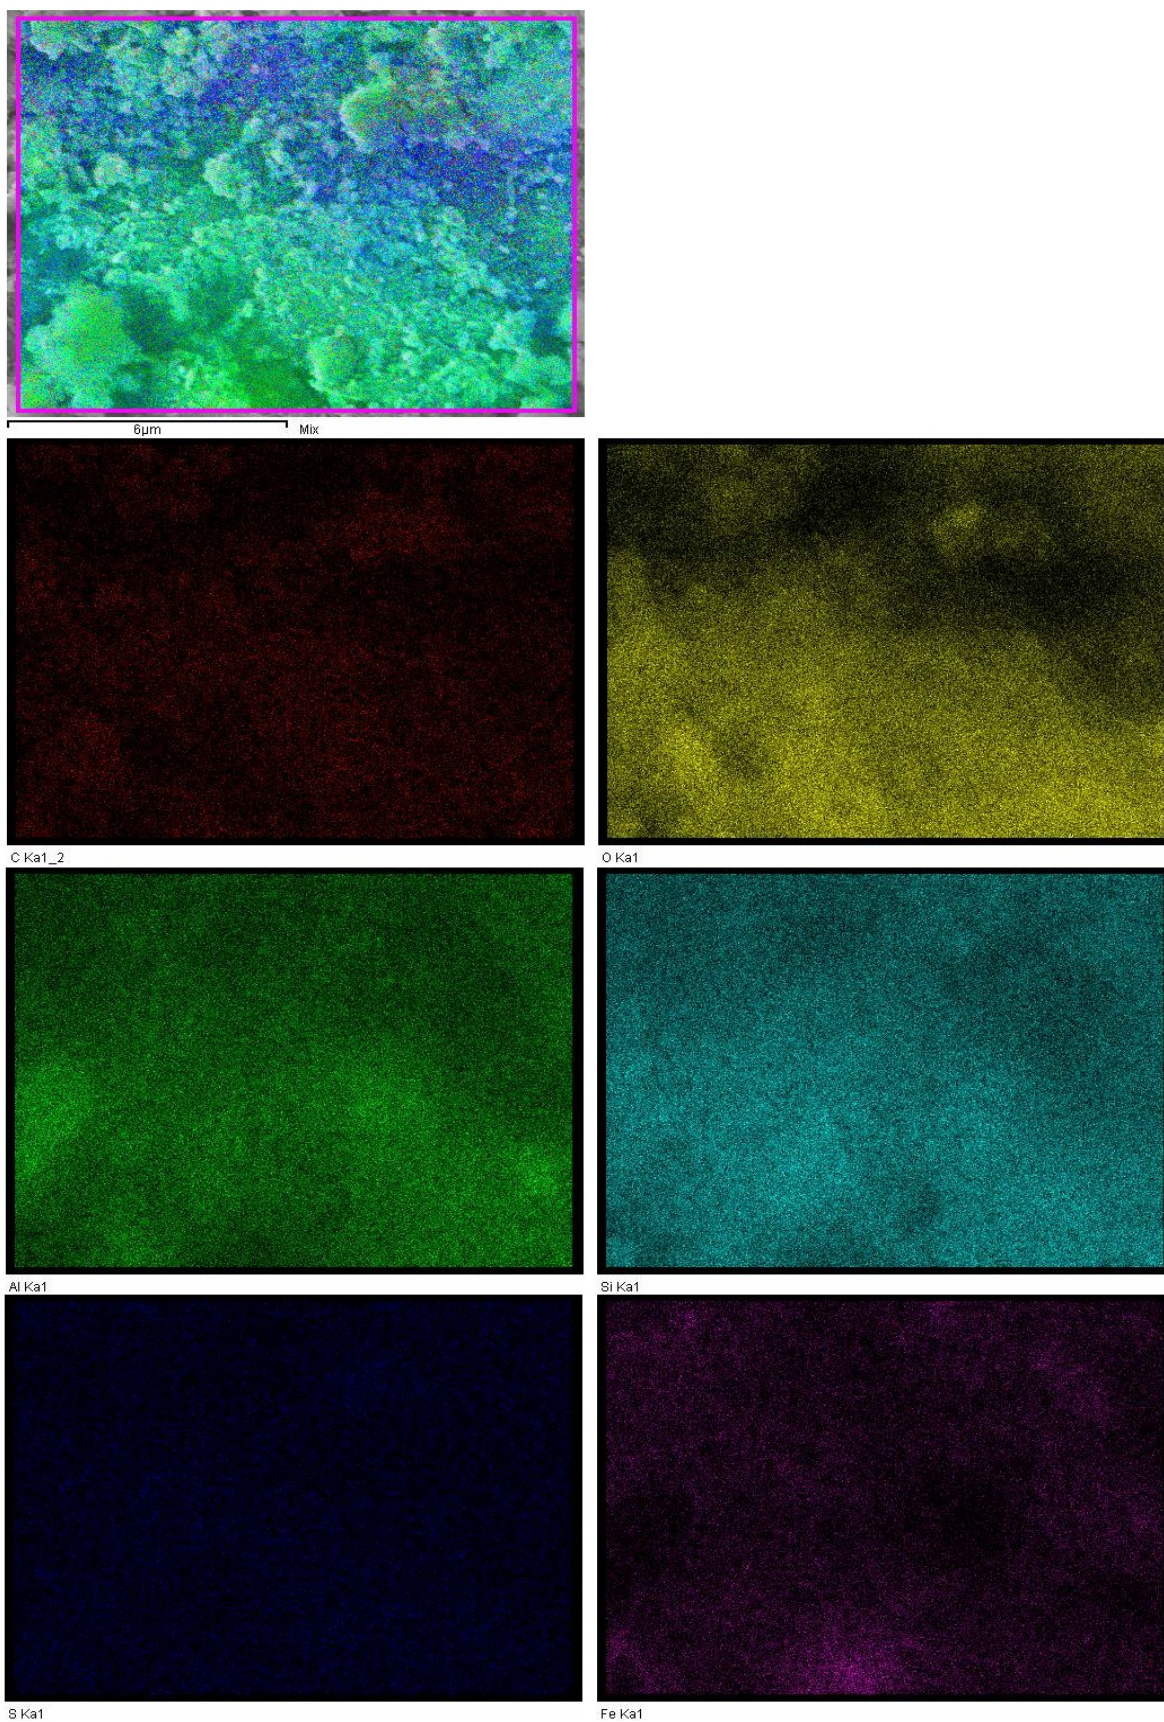

*Figure S1. STEM Elemental Mapping of M-Fe<sub>3</sub>O<sub>4</sub>@HAL-SO<sub>3</sub>H*

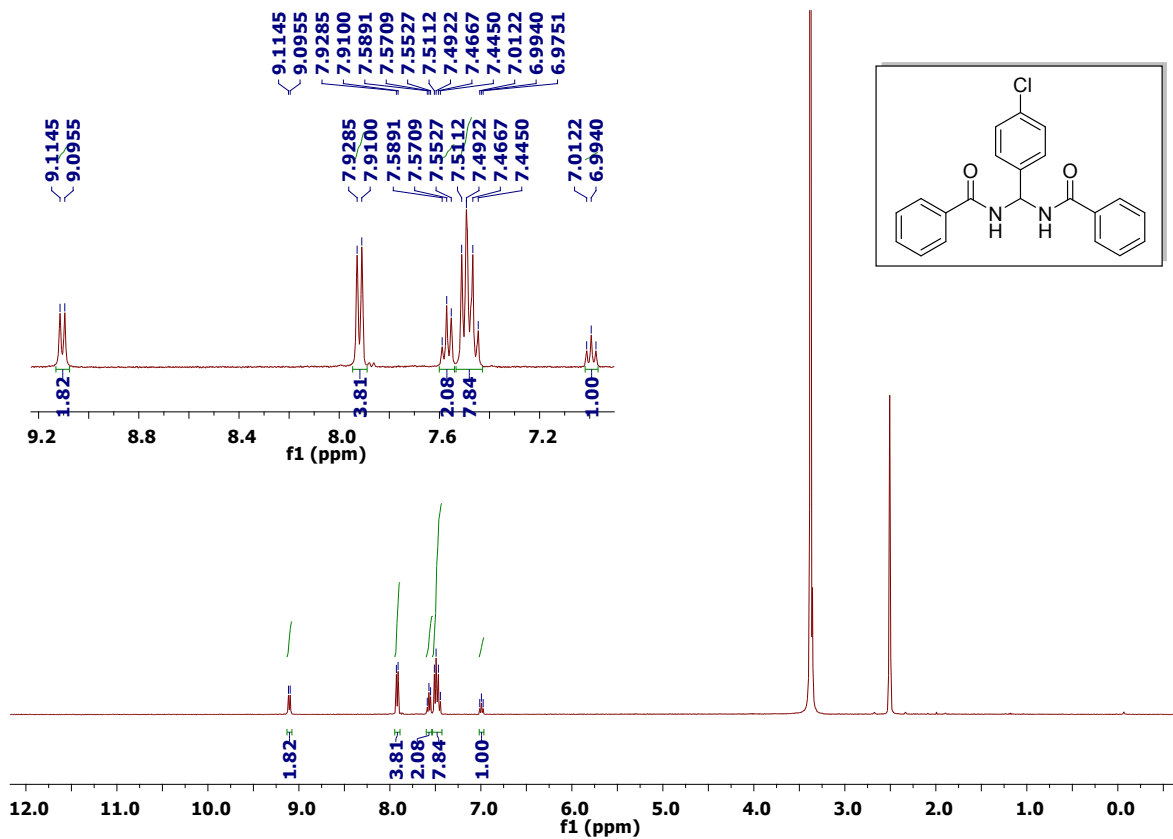

Figure S2.  $^1\text{H}$  NMR spectra of *N,N'*-(4-Chlorophenylmethylene)dibenzamide (table 2, entry 1d)

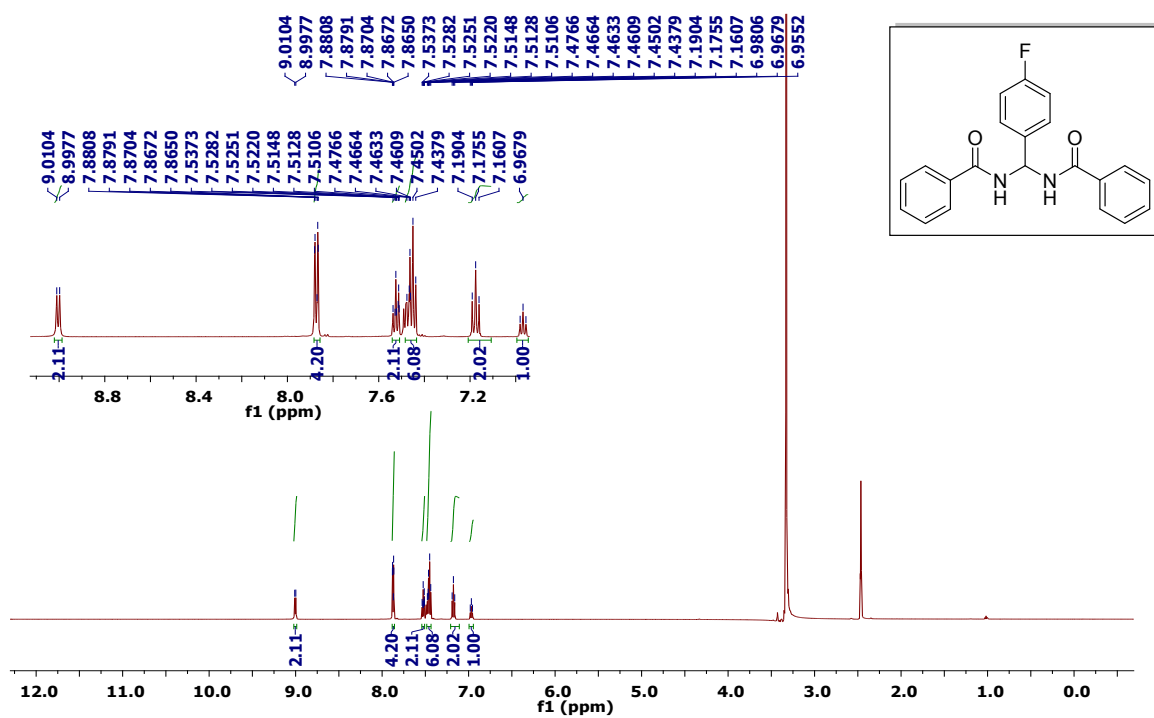

Figure S3  $^1\text{H}$  NMR spectra of *N,N'*-(4-Fluorophenylmethylene)dibenzamide (table 2, entry 1f)

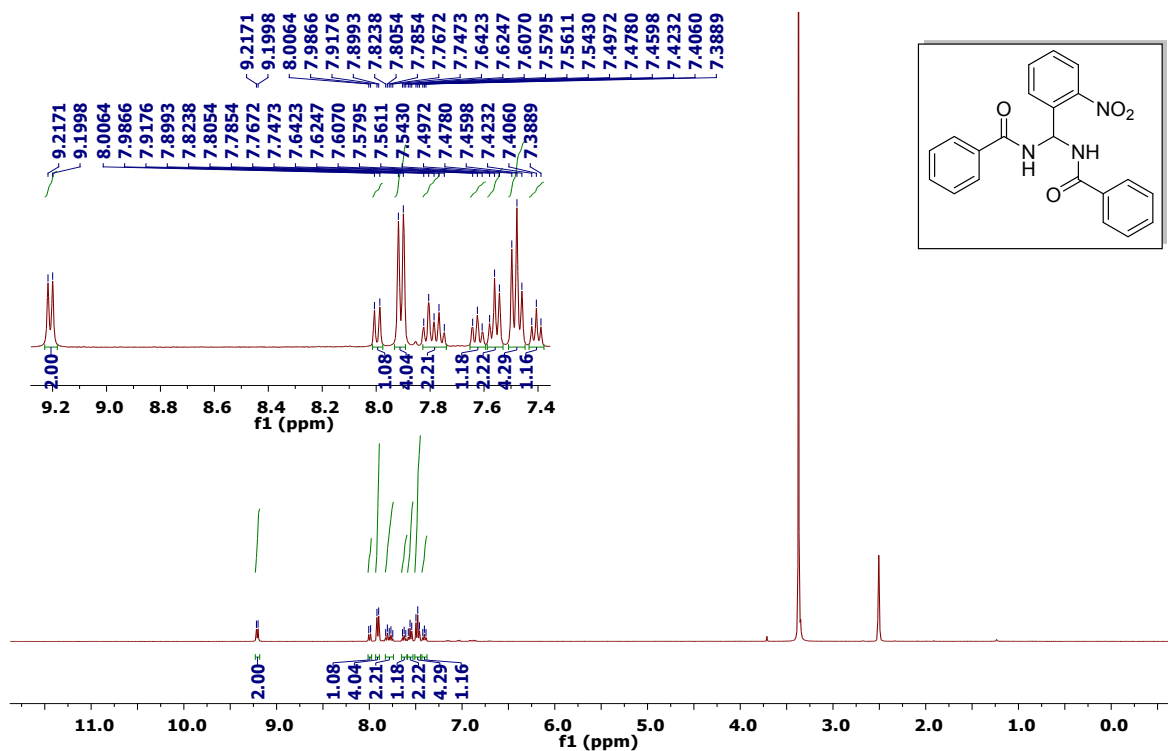

Figure S4 <sup>1</sup>H NMR spectra of *N,N'*-(2-Nitrophenylmethylene)dibenzamide (table 2, entry 1g)

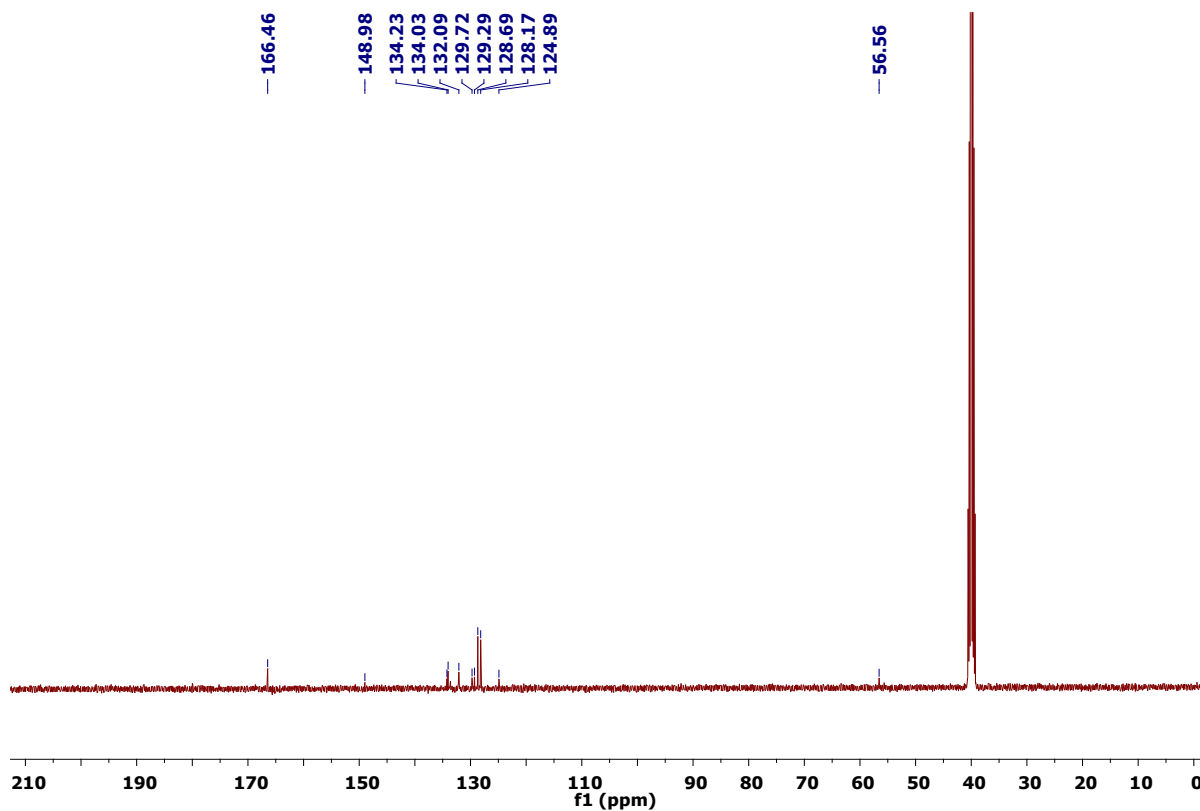

210 190 170 150 130 110 90 80 70 60 50 40 30 20 10 0

Figure S5 <sup>13</sup>C spectra of *N,N'*-(2-Nitrophenylmethylene)dibenzamide (table 2, entry 1g)

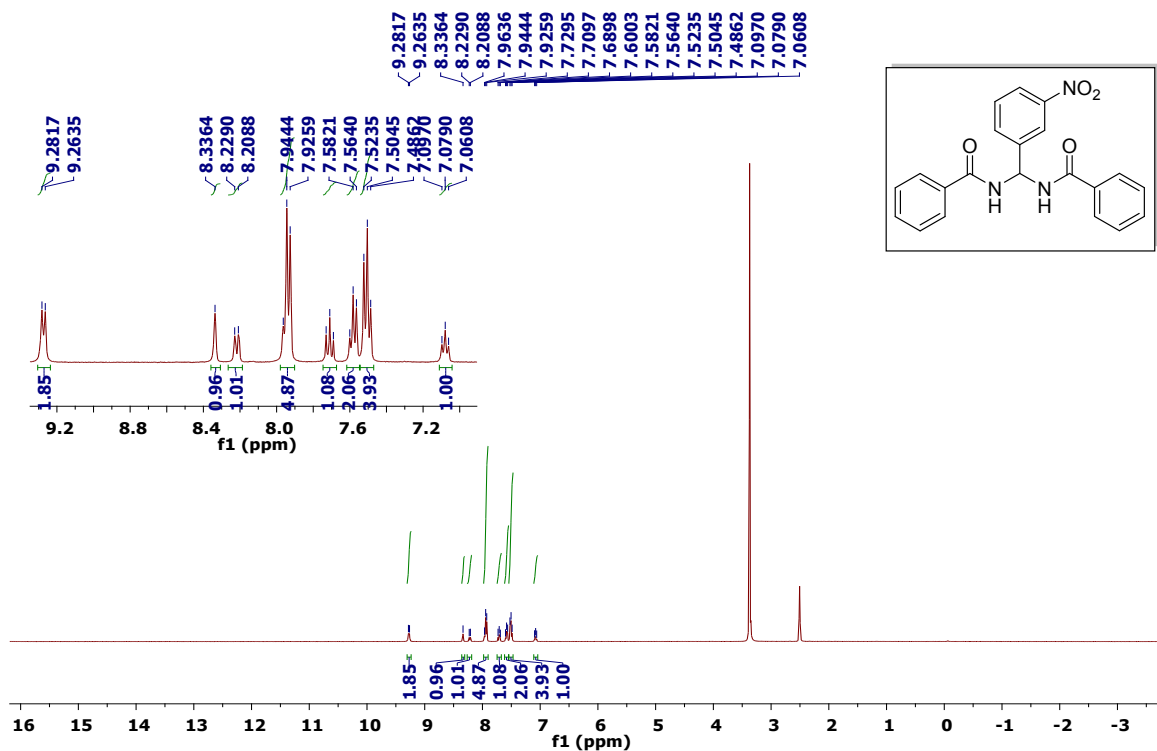

Figure S6  $^1\text{H}$  NMR spectra of *N,N'*-(3-nitrophenylmethylene)dibenzamide (table 2, entry 1h)

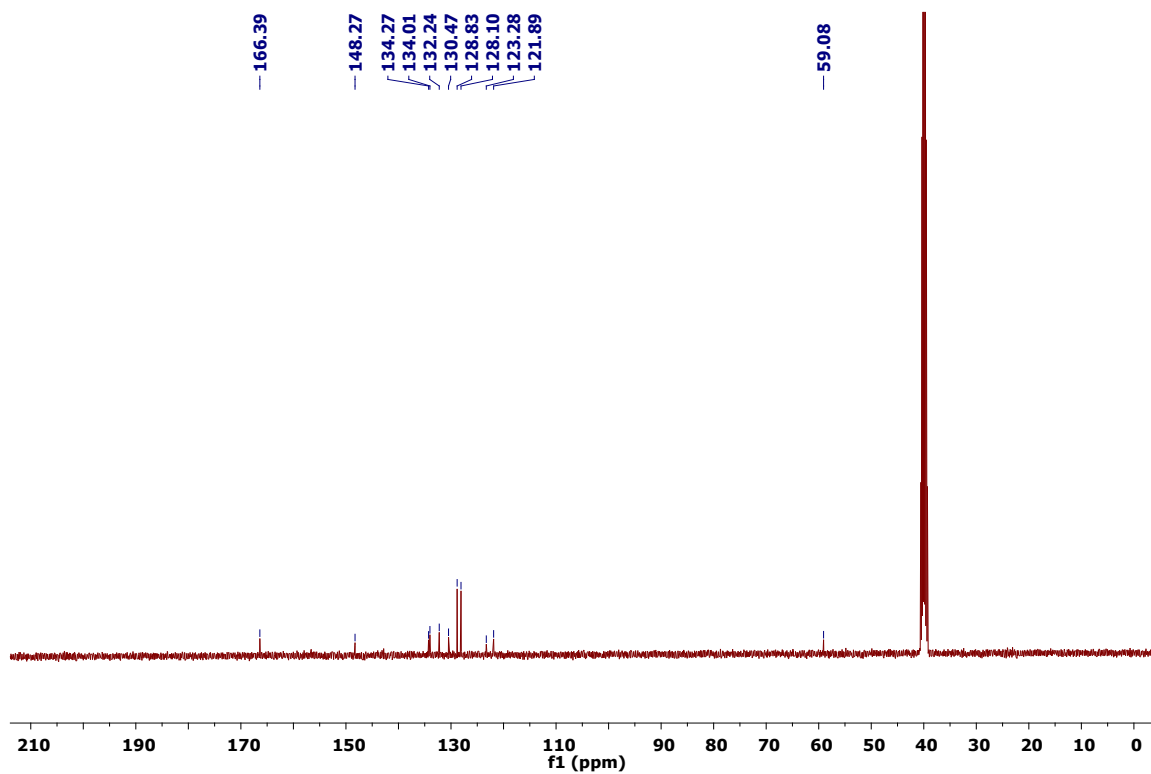



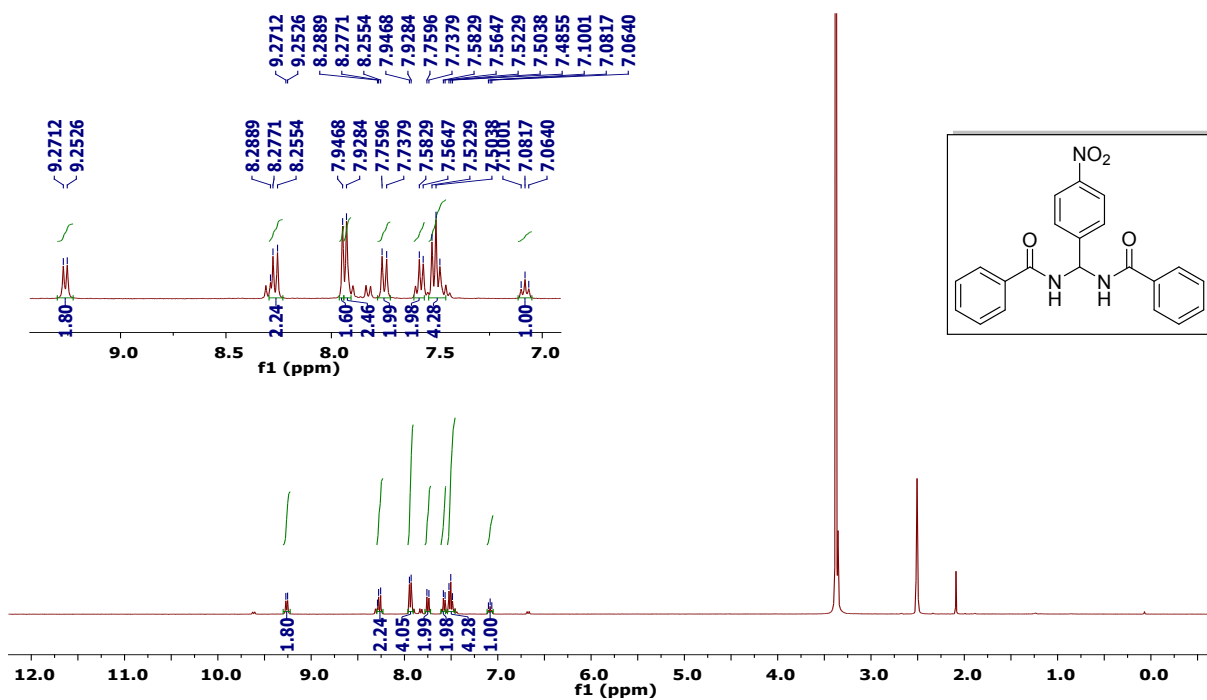

Figure S8 <sup>1</sup>H NMR spectra of *N,N'*-(4-Nitrophenylmethylene)dibenzamide (table 2, entry 1i)

Figure S7 <sup>13</sup>C spectra of *N,N'*-(3-Nitrophenylmethylene)dibenzamide (table 2, entry 1h)

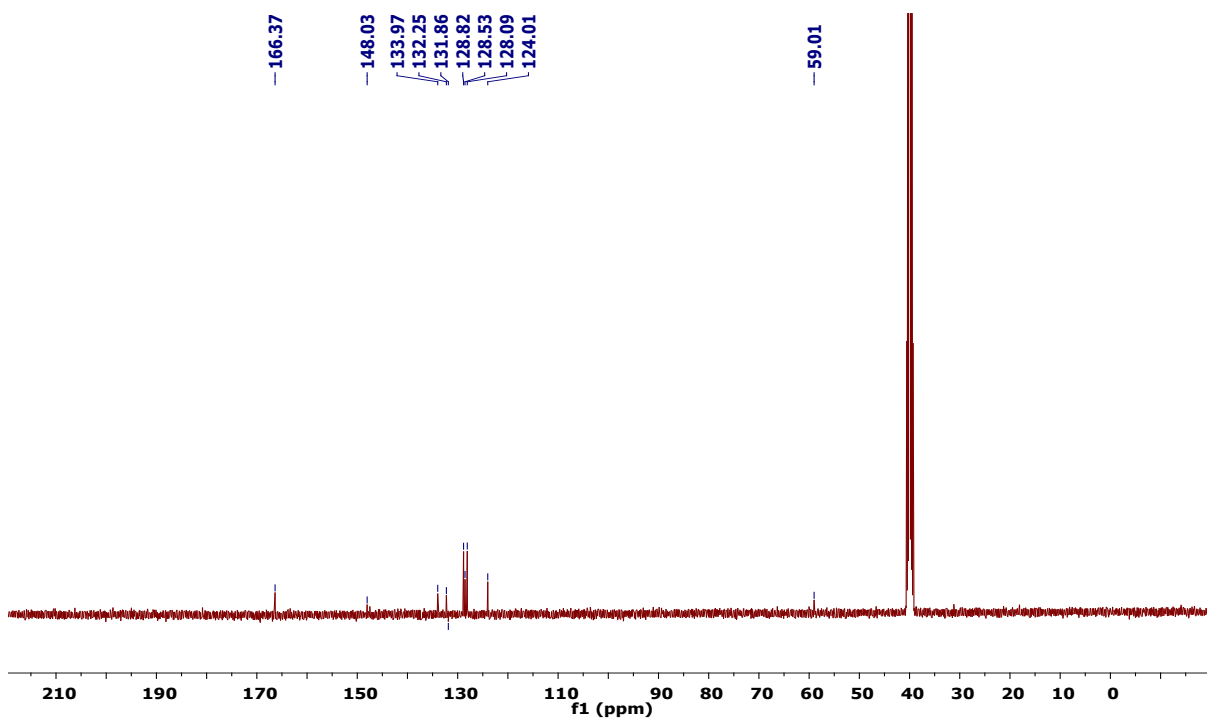

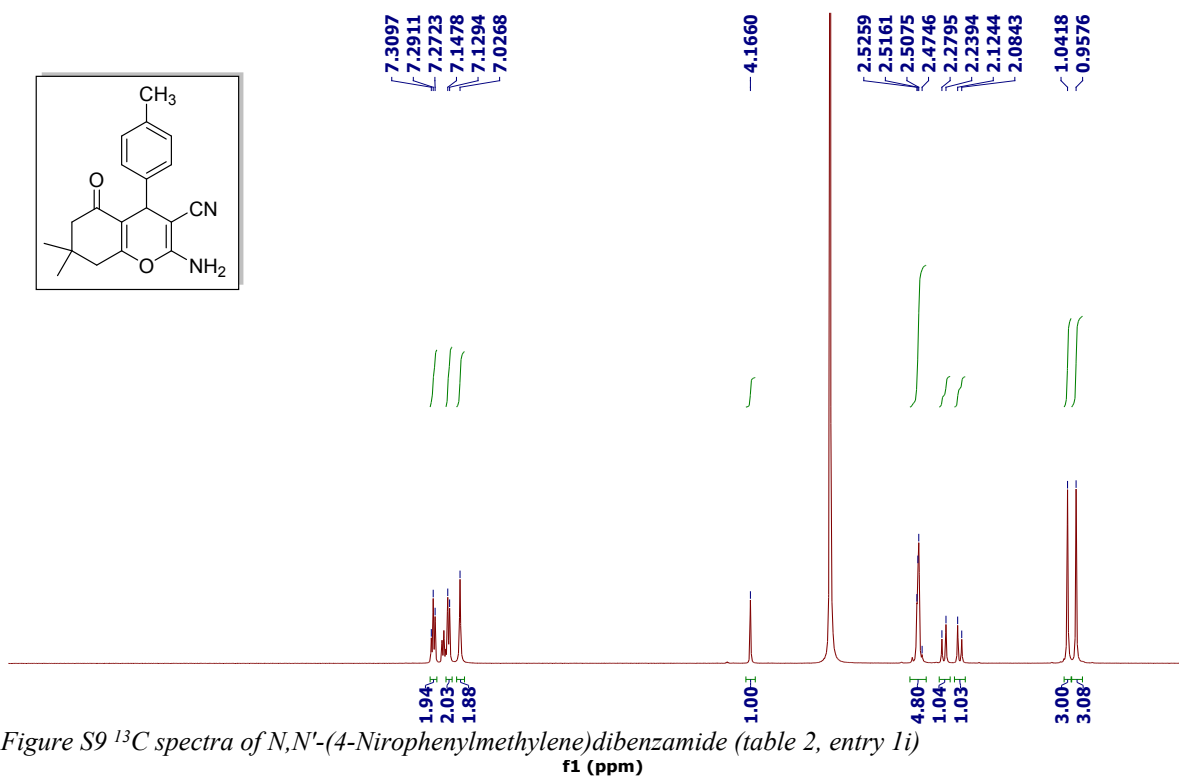

Figure S10  $^1\text{H}$  NMR spectra of 2-Amino-7,7-dimethyl-4-(4-Methylphenyl)-5-oxo-5,6,7,8-tetrahydro-4H-chromene-3-carbonitrile (table 5, entry 2b)

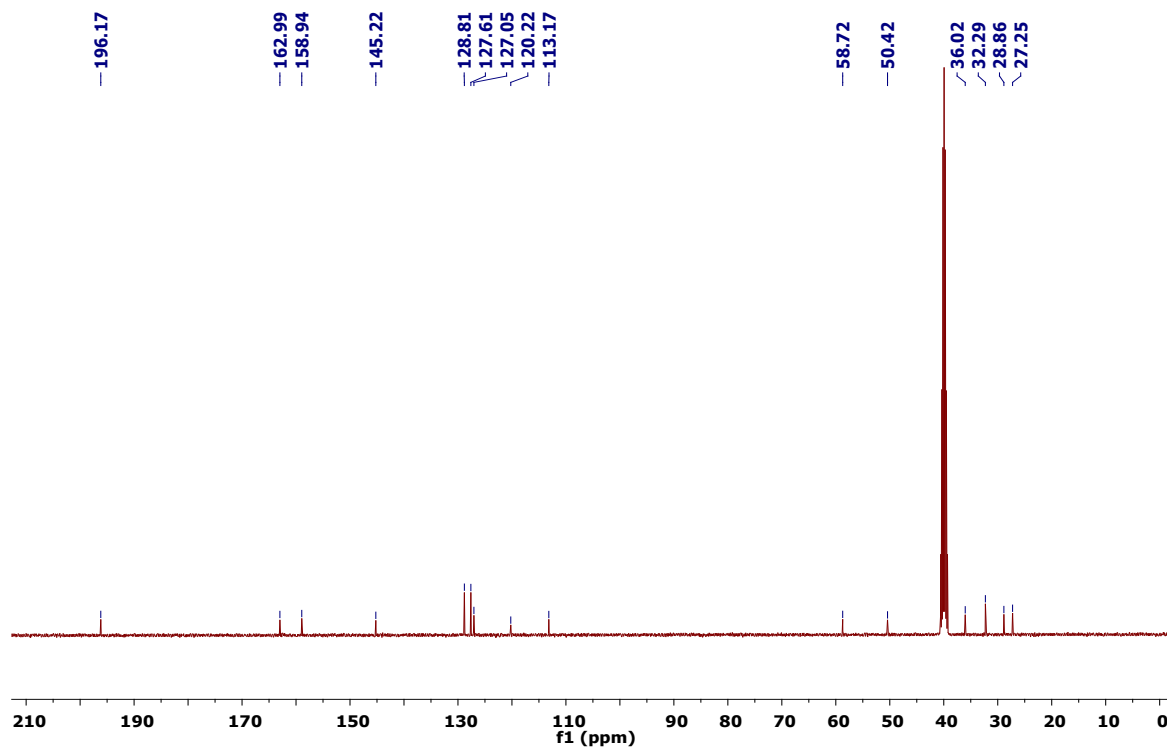

Figure S11  $^{13}\text{C}$  spectra of 2-Amino-7,7-dimethyl-4-(4-Methylphenyl)-5-oxo-5,6,7,8-tetrahydro-4H-chromene-3-carbonitrile (table 5, entry 2b)

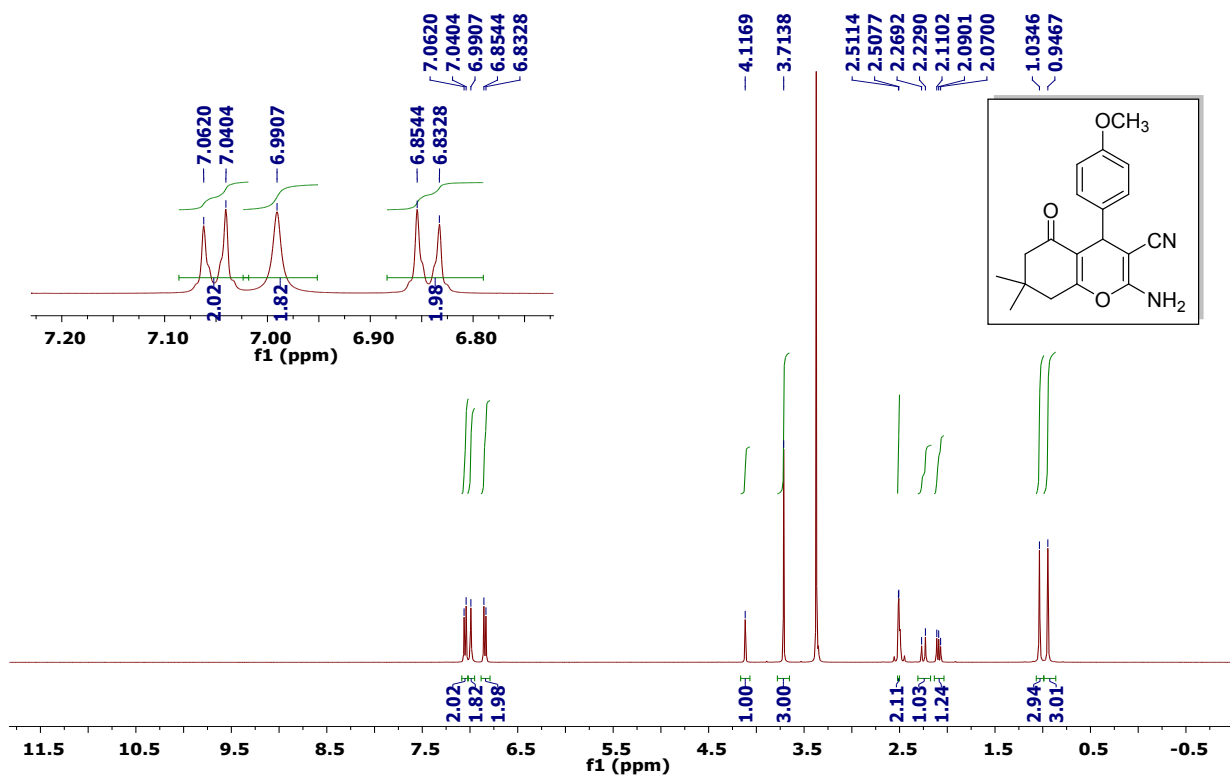

Figure 12 Figure  $^1\text{H}$  NMR spectra of 2-Amino-7,7-dimethyl-4-(4-Methoxy-phenyl)-5-oxo-5,6,7,8-tetrahydro-4H-chromene-3-carbonitrile (table 5, entry 2c)

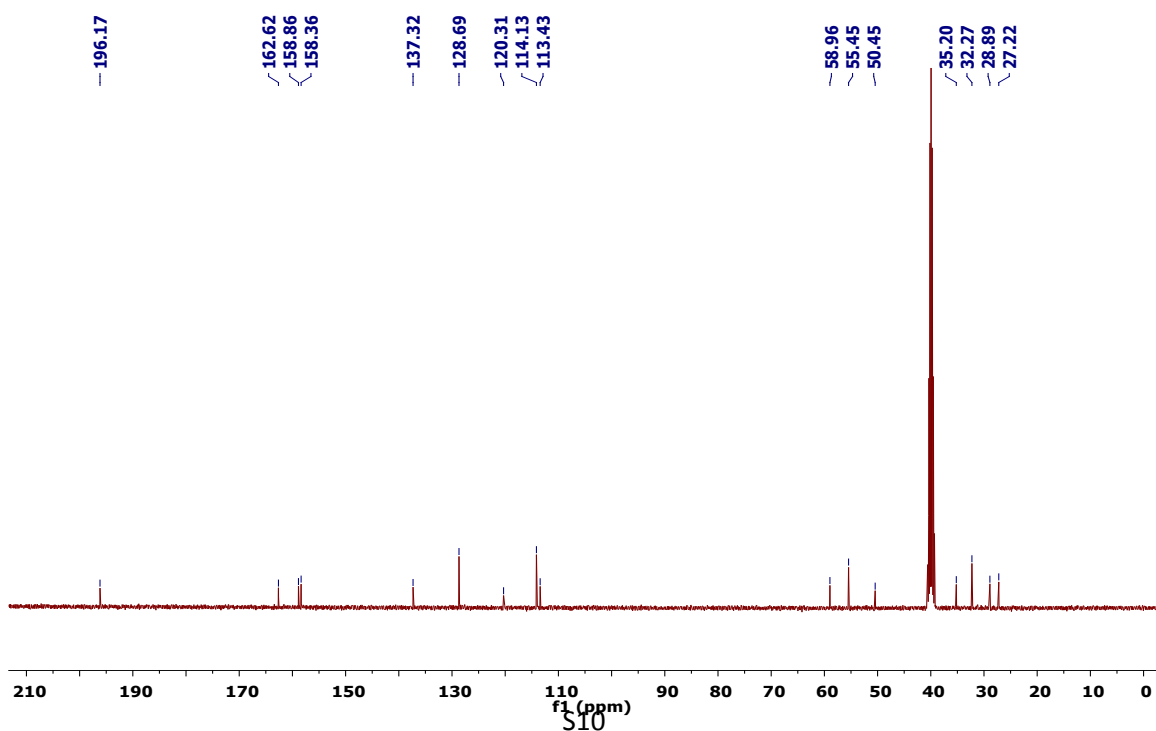

Figure 13  $^{13}\text{C}$  spectra of 2-Amino-7,7-dimethyl-4-(4-Methoxy-phenyl)-5-oxo-5,6,7,8-tetrahydro-4H-chromene-3-carbonitrile (table 5, entry 2c)

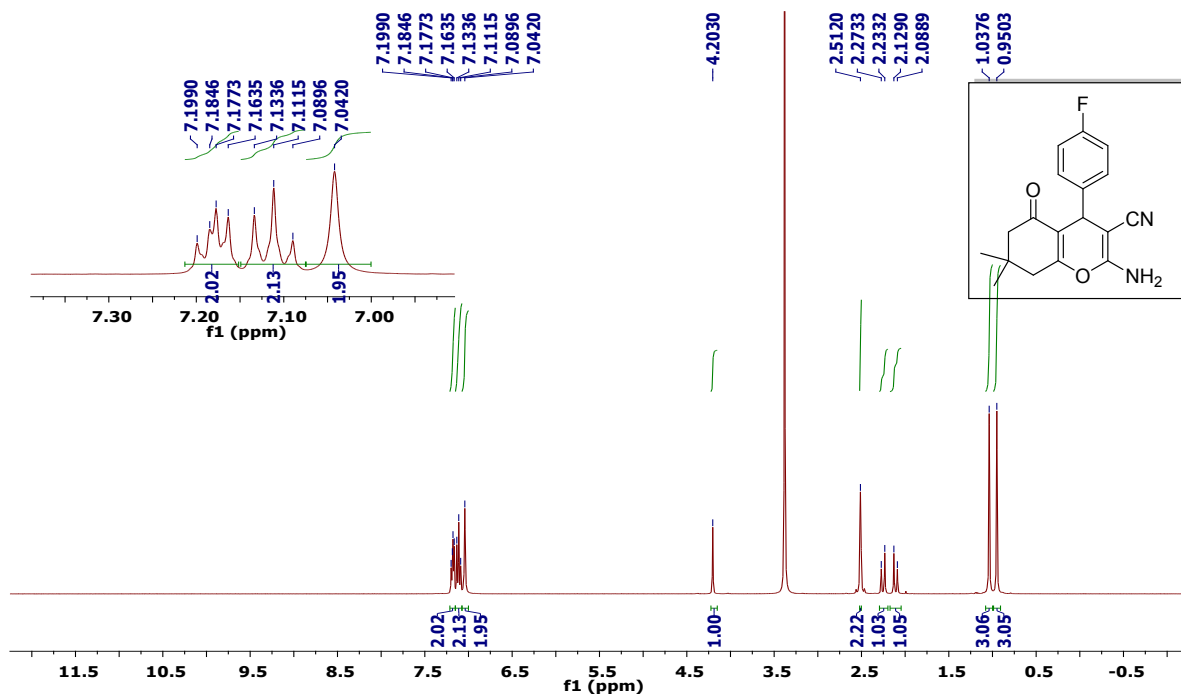

Figure S14 <sup>1</sup>H NMR spectra of 2-Amino-7,7-dimethyl-4-(4-Fluorophenyl)-5-oxo-5,6,7,8-tetrahydro-4H-chromene-3-carbonitrile (table 5, entry 2h)

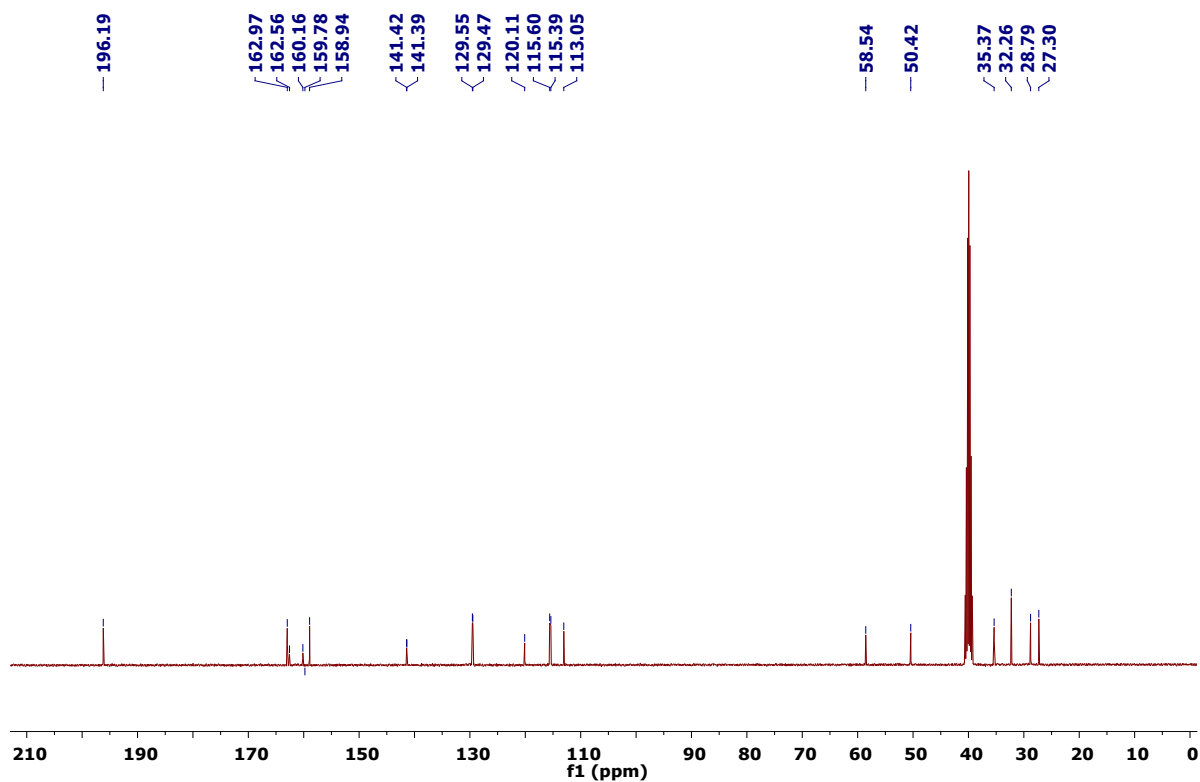

Figure 15 <sup>13</sup>C spectra of 2-Amino-7,7-dimethyl-4-(4-Fluorophenyl)-5-oxo-5,6,7,8-tetrahydro-4H-chromene-3-carbonitrile (table 5, entry 2h)

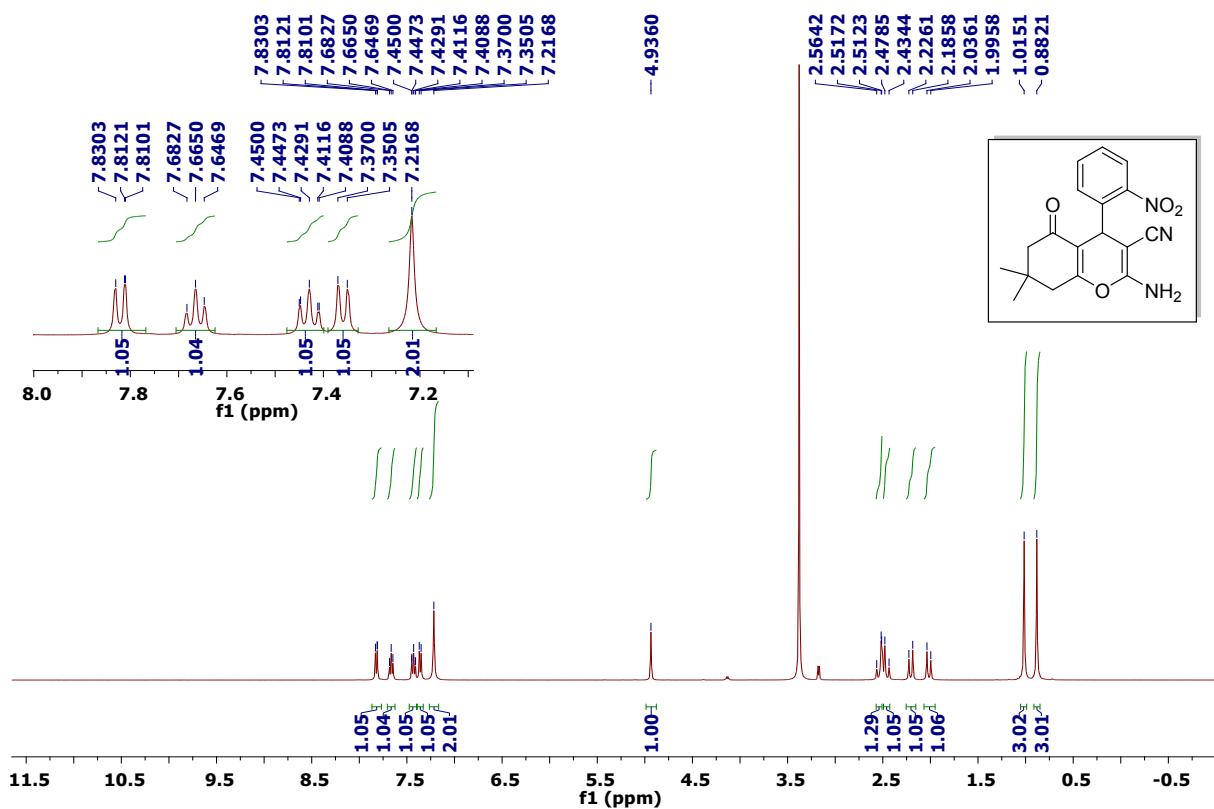

Figure S16 <sup>1</sup>H NMR spectra of 2-Amino-7,7-dimethyl-4-(2-Nitrophenyl)-5-oxo-5,6,7,8-tetrahydro-4H-chromene-3-carbonitrile (table 5, entry 2i)

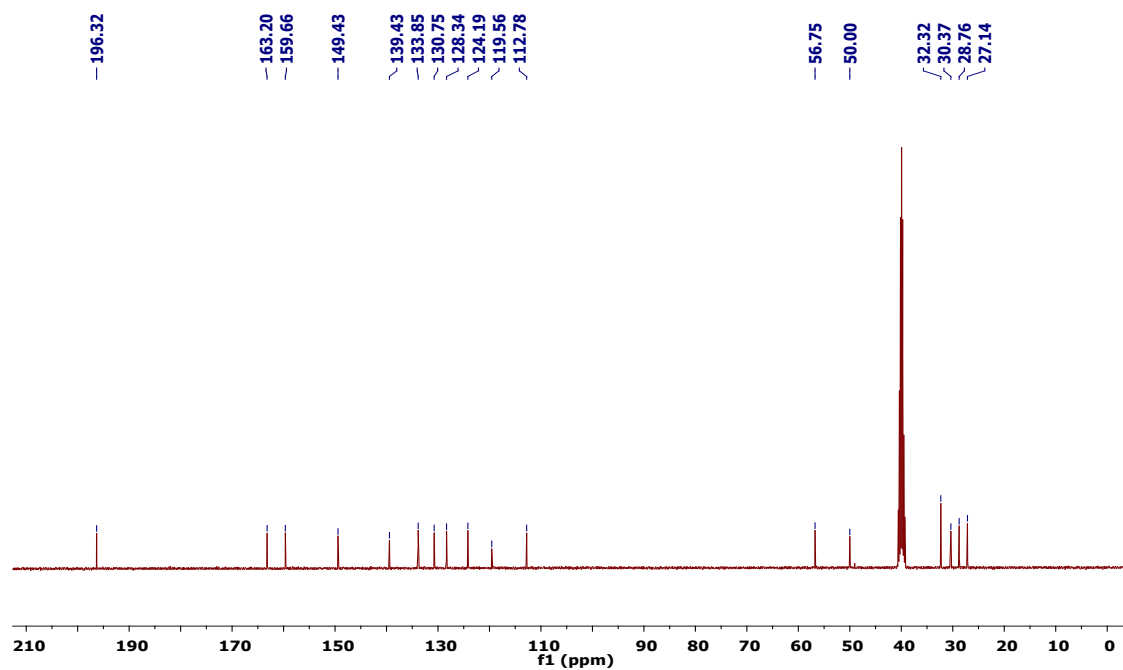

Figure S17 <sup>13</sup>C spectra of 2-Amino-7,7-dimethyl-4-(2-Nitrophenyl)-5-oxo-5,6,7,8-tetrahydro-4H-chromene-3-carbonitrile (table 5, entry 2i)

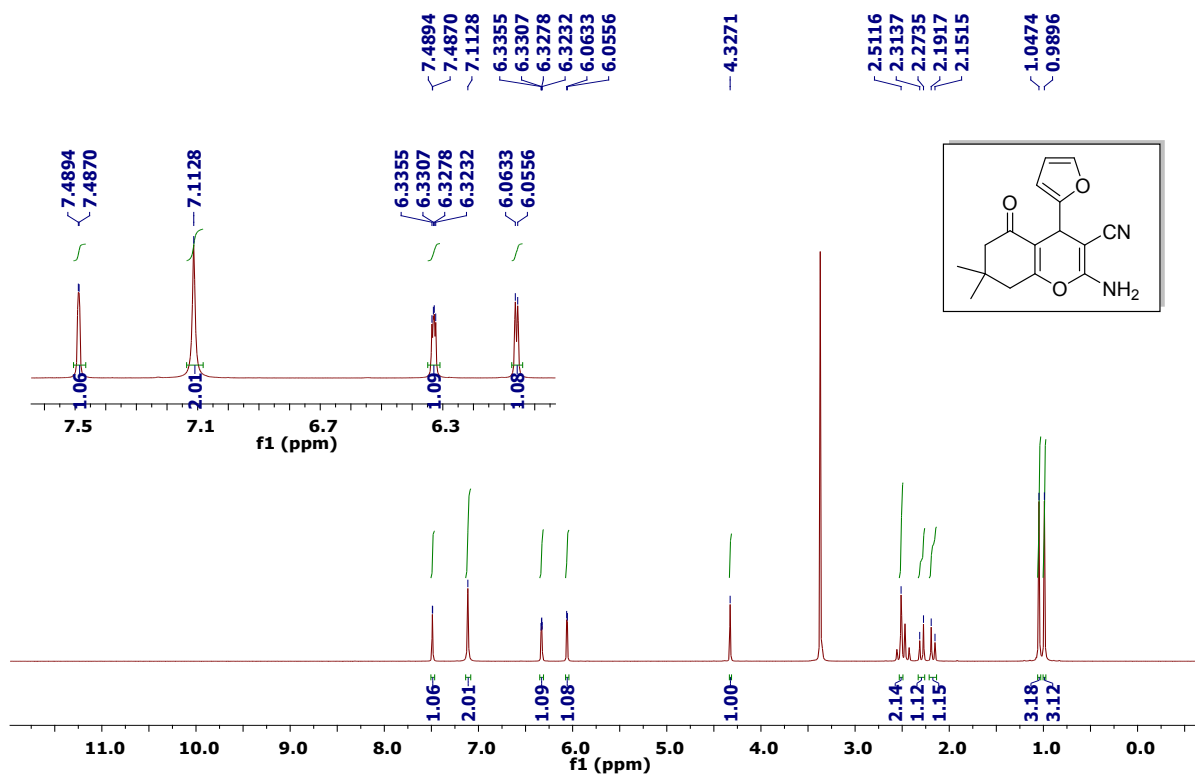

Figure S18 <sup>1</sup>H NMR of 2-Amino-7,7-dimethyl-4-(4-Furan)-5-oxo-5,6,7,8-tetrahydro-4H-chromene-3-carbonitrile (table 5, entry 2l)

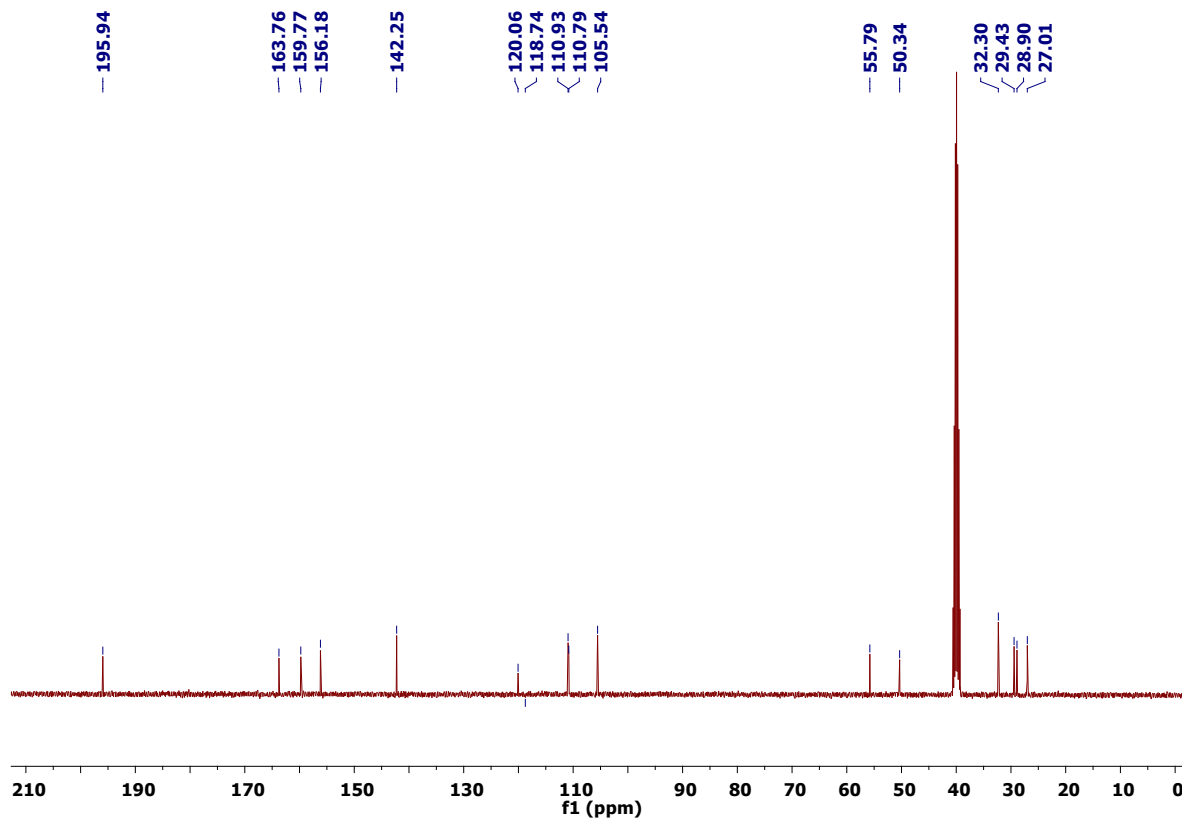

Figure S19 <sup>13</sup>C spectra of 2-Amino-7,7-dimethyl-4-(4-Furan)-5-oxo-5,6,7,8-tetrahydro-4H-chromene-3-carbonitrile (table 5, entry 2l)
